# Supplementary material for: A Promoter Polymorphism (rs17222919, −1316T/G) of ALOX5AP Gene Is Associated with Decreased Risk of Ischemic Stroke in Two Independent Chinese Populations
Source: PLoS One. 2015 Mar 27;10(3):e0122393. doi: 10.1371/journal.pone.0122393 (PMC4376390; doi:10.1371/journal.pone.0122393)
Supplement: S1 Dataset — (XLS) [file pone.0122393.s003.xls]

## Sheet: fan20140508
Firefly, Label No.1, [ RLU ]
Time/Pos	0		F/R
F01	16240082		6.9911		6.54489
F02	15223519		6.38218
F03	13207846		6.2614
F04	8857989		5.71968		5.65658
F05	9234320		5.6533
F06	8581222		5.59676
F07	6284828		3.85862		3.50828
F08	4762431		3.21005
F09	5381767		3.45616
Renilla, Label No.2, [ RLU ]
Time/Pos	0
F01	2322966
F02	2385315
F03	2109408
F04	1548686
F05	1633439
F06	1533248
F07	1628775
F08	1483598
F09	1557151
